# Supplementary material for: Differential gene expression in multiple neurological, inflammatory and connective tissue pathways in a spontaneous model of human small vessel stroke
Source: PubMed Central journal article supplement (PMC4260148; doi:10.1111/nan.12116), 2014-11-17
Supplement: nan0040-0855-SD1.pdf [file nan0040-0855-SD1.pdf]

SUPPLEMENTARY MATERIAL

Supplementary Table 1: Details of differentially expressed genes in the “neurological disorders” functional pathway identified in IPA.

| Functions Annotation    | p-Value  | Predicted Activation State | Regulation z-score | Molecules                                                                                                                                                                                                                                                                                                                                                                                                                | # Molecules |
|-------------------------|----------|----------------------------|--------------------|--------------------------------------------------------------------------------------------------------------------------------------------------------------------------------------------------------------------------------------------------------------------------------------------------------------------------------------------------------------------------------------------------------------------------|-------------|
| Encephalopathy          | 1.51E-10 |                            | -0.706             | ALB, BHLHE40, C20orf7, C3, C4B (includes others), CTGF, DUSP1, EGR1, EGR2, EGR4, FAM173A, FGF12, FGF13, FKBP8, FOS, FOXG1, GABRA5, GFAP, GOLPH3, GPR98, HLA-DMA, IER5, JUNB, KCNC2, MAL2, MAP1B, MAP4K1, MYO1B, MYT1L, NFIA, NFIB, NGFR, PDCL, PDE10A, PGRMC1, PLCB1, PLP1 (includes EG:18823), POLL, POLR2I, PTEN, PTGS2, S100B, SCN2A, SCN3A, SCOC, SERPINI1, SGK1, SLC1A3, SNAP25, SSR3, STK17B, VSNL1, ZNF440/ZNF808 | 53          |
| Huntington's disease    | 1.92E-09 |                            |                    | BHLHE40, C3, C4B (includes others), CTGF, EGR1, EGR2, EGR4, FAM173A, FGF12, FGF13, FOS, FOXG1, GABRA5, GFAP, IER5, JUNB, MAL2, MYO1B, MYT1L, PDCL, PDE10A, PGRMC1, PLCB1, POLR2I, SCN2A, SCN3A, SCOC, SERPINI1, SGK1, SLC1A3, SNAP25, SSR3, VSNL1, ZNF440/ZNF808                                                                                                                                                         | 34          |
| Neuromuscular disease   | 2.95E-08 |                            |                    | ALB, BHLHE40, C3, C4B (includes others), COLQ, CTGF, EGR1, EGR2, EGR4, FAM173A, FGF12, FGF13, FOS, FOXG1, GABRA5, GFAP, HLA-DMA, IER5, JUNB, MAL2, MAP1B, MYO1B, MYT1L, NGFR, PDCL, PDE10A, PGRMC1, PLCB1, POLR2I, PTGS2, S100B, SCN2A, SCN3A, SCOC, SERPINI1, SGK1, SLC1A3, SNAP25, SSR3, VSNL1, ZNF440/ZNF808                                                                                                          | 41          |
| Movement disorder       | 3.96E-07 |                            |                    | BHLHE40, C3, C4B (includes others), CTGF, EGR1, EGR2, EGR4, FAM173A, FGF12, FGF13, FOS, FOXG1, GABRA5, GFAP, IER5, JUNB, KCNC2, MAL2, MAP1B, MYO1B, MYT1L, NGFR, PDCL, PDE10A, PGRMC1, PLCB1, PLP1 (includes EG:18823), POLR2I, PTGS2, SCN2A, SCN3A, SCOC, SERPINI1, SGK1, SLC1A3, SNAP25, SSR3, VSNL1, ZNF440/ZNF808                                                                                                    | 39          |
| Seizures                | 8.58E-06 | Increased                  | 2.135              | BHLHE40, C3, FOS, GABRA5, GJC2, GPR98, KCNC2, MAP1B, NGFR, PLCB1, PLCL1, PTEN, PTGS2, SCN2A, SLC1A3, TRIM3                                                                                                                                                                                                                                                                                                               | 16          |
| Multiple system atrophy | 5.70E-04 |                            |                    | C20orf7, SCN2A, SCN3A, SLC1A3                                                                                                                                                                                                                                                                                                                                                                                            | 4           |

|                                   |          |                                                                                                                                            |    |
|-----------------------------------|----------|--------------------------------------------------------------------------------------------------------------------------------------------|----|
| Pelizaeus-Merzbacher disease      | 1.22E-03 | GJC2, PLP1 (includes EG:18823)                                                                                                             | 2  |
| Major depression                  | 1.78E-03 | BTG2, C7orf23, GABRA5, GFAP, IGFBP2, PDE10A, PSIP1, SYMPK, TTR                                                                             | 9  |
| Stroke                            | 1.95E-03 | ALB, GABRA5, NGFR, PTGS2, S100B, SNAP25, VSNL1                                                                                             | 7  |
| Leakage of blood-brain barrier    | 2.01E-03 | PTGS2, SERPINI1                                                                                                                            | 2  |
| Allodynia                         | 2.34E-03 | PTGDS, PTGS2, S100B, SLC1A3                                                                                                                | 4  |
| Agenesis of corpus callosum       | 4.15E-03 | MAP1B, NFIB                                                                                                                                | 2  |
| Hyperproliferation of brain cells | 4.15E-03 | BTG2, SSTR2                                                                                                                                | 2  |
| Cerebellar ataxia                 | 4.24E-03 | SCN2A, SCN3A, SLC1A3                                                                                                                       | 3  |
| Fragile X syndrome                | 4.24E-03 | SCN2A, SCN3A, SLC1A3                                                                                                                       | 3  |
| Amyotrophic lateral sclerosis     | 4.73E-03 | GABRA5, GFAP, NGFR, PTGS2, SCN2A, SCN3A, SLC1A3                                                                                            | 7  |
| Cervical spondylotic myelopathy   | 4.80E-03 | SCN2A, SCN3A, SLC1A3                                                                                                                       | 3  |
| Tumorigenesis of brain cells      | 5.48E-03 | MYCN, SSTR2                                                                                                                                | 2  |
| Neurodegenerative disorder        | 7.88E-03 | C20orf7, C3, CTGF, GABRA5, GFAP, GJC2, IGF2, IGFBP2, IGFBP6, NGFR, PLP1 (includes EG:18823), PTEN, PTGDS, PTGS2, SCN2A, SCN3A, SLC1A3, TTR | 18 |
| Schizophrenia                     | 8.64E-03 | EGR4, GABRA5, GFAP, GNAI1, MLLT11, NFKBIA, NPTN, PLP1 (includes EG:18823), PNPLA8, PTGS2, S100B, SERPINI1, SLC1A3, SNAP25, TTR, VSNL1      | 16 |
| Age-related macular degeneration  | 9.89E-03 | C2, C3, CFH                                                                                                                                | 3  |
| Progressive supranuclear palsy    | 9.89E-03 | SCN2A, SCN3A, SLC1A3                                                                                                                       | 3  |
| Macrocephaly                      | 1.05E-02 | POLL, PTEN                                                                                                                                 | 2  |
| Brain cancer                      | 1.25E-02 | BTG2, FOXG1, GFAP, IGF2, IGFBP2, MCL1, MMP14, MYCN, PTEN                                                                                   | 9  |
| Hydrocephalus                     | 1.29E-02 | GFAP, NFIA, POLL, S100B                                                                                                                    | 4  |

|                                       |          |                                                                                                                                |    |
|---------------------------------------|----------|--------------------------------------------------------------------------------------------------------------------------------|----|
| Neuropathy                            | 1.40E-02 | EGR1, EGR2, GABRA5, GFAP, HLA-DMA, MAP1B, NGFR, PLP1<br>(includes EG:18823), PTGS2, SCN2A, SCN3A, SGK1, SLC1A3, SNAP25,<br>TTR | 15 |
| Cockayne syndrome<br>type I           | 1.44E-02 | ERCC8                                                                                                                          | 1  |
| Lhermitte-Duclos<br>disease           | 1.44E-02 | PTEN                                                                                                                           | 1  |
| Macrocephal-autism<br>syndrome        | 1.44E-02 | PTEN                                                                                                                           | 1  |
| Pelizaeus-Merzbacher-<br>like disease | 1.44E-02 | GJC2                                                                                                                           | 1  |
| Pitt-Hopkins syndrome                 | 1.44E-02 | TCF4                                                                                                                           | 1  |

Supplementary Table 2: Details of differentially expressed genes in the “inflammation” functional pathway identified in IPA.

| Functions Annotation                        | p-Value  | Predicted Activation State | Regulation z-score | Molecules                                                                                                                                                                                                                                                                                                                             | # Molecules |
|---------------------------------------------|----------|----------------------------|--------------------|---------------------------------------------------------------------------------------------------------------------------------------------------------------------------------------------------------------------------------------------------------------------------------------------------------------------------------------|-------------|
| Rheumatic disease                           | 3.82E-06 |                            | 0.071              | ALB, C2, C3, C4B (includes others), CLIC2, COL3A1, COL6A1, CPE (includes EG:12876), DUSP1, EGR2, FOS, GABRA5, GALNT2, GOLPH3, HLA-C, HLA-MA, MAP4K1, MAPRE1, MCL1, MMP14, NFKBIA, NGFR, NR4A3, PHACTR3, PTEN, PTGDS, PTGS2, RALB, RNF149, RNF39, RPS16, RPS18, SCN2A, SCN3A, SLC1A3, SNAP25, STK17B, TCF4, VPS52 (includes EG:224705) | 39          |
| Arthritis                                   | 1.32E-05 |                            | 0.449              | ALB, C2, C3, C4B (includes others), CLIC2, COL3A1, COL6A1, CPE (includes EG:12876), DUSP1, FOS, GABRA5, GALNT2, GOLPH3, HLA-C, HLA-DMA, MAP4K1, MAPRE1, MCL1, MMP14, NFKBIA, NGFR, NR4A3, PHACTR3, PTEN, PTGDS, PTGS2, RALB, RNF149, RNF39, RPS16, RPS18, SNAP25, STK17B, TCF4, VPS52 (includes EG:224705)                            | 35          |
| Rheumatoid arthritis                        | 7.55E-05 |                            |                    | ALB, C2, C4B (includes others), CLIC2, COL3A1, DUSP1, FOS, GABRA5, GALNT2, GOLPH3, HLA-C, HLA-DMA, MAPRE1, MCL1, NFKBIA, NGFR, NR4A3, PHACTR3, PTGS2, RALB, RNF149, RNF39, RPS16, RPS18, STK17B, TCF4, VPS52 (includes EG:224705)                                                                                                     | 27          |
| Juvenile rheumatoid arthritis               | 3.11E-04 |                            |                    | ALB, CLIC2, FOS, MCL1, NFKBIA, NR4A3, PTGS2, RALB                                                                                                                                                                                                                                                                                     | 8           |
| Polyarticular juvenile rheumatoid arthritis | 1.61E-03 |                            |                    | FOS, MCL1, NFKBIA, NR4A3, PTGS2, RALB                                                                                                                                                                                                                                                                                                 | 6           |
| Splenomegaly                                | 3.82E-03 |                            | -0.417             | C3, C4B (includes others), INPP5D, NFKBIA, PTEN                                                                                                                                                                                                                                                                                       | 5           |
| Pulmonary interstitial fibrosis             | 4.15E-03 |                            |                    | EGR1, PTGS2                                                                                                                                                                                                                                                                                                                           | 2           |
| Cervical spondylotic myelopathy             | 4.80E-03 |                            |                    | SCN2A, SCN3A, SLC1A3                                                                                                                                                                                                                                                                                                                  | 3           |
| Acne                                        | 1.11E-02 |                            |                    | COL3A1, CYP11B1, PLA2G2A, PTGS2, SGK1                                                                                                                                                                                                                                                                                                 | 5           |
| Lichen planus                               | 1.43E-02 |                            |                    | COL3A1, HBB, HLA-C, IFI27, IGFBP6                                                                                                                                                                                                                                                                                                     | 5           |
| Allergic contact eczema                     | 1.44E-02 |                            |                    | HLA-C                                                                                                                                                                                                                                                                                                                                 | 1           |
| Arthritis of bone                           | 1.44E-02 |                            |                    | MMP14                                                                                                                                                                                                                                                                                                                                 | 1           |
| Chronic suppurative sinusitis               | 1.44E-02 |                            |                    | POLL                                                                                                                                                                                                                                                                                                                                  | 1           |
